# Supplementary material
Source: Springer Nature journal article supplement (https://www.springermedizin.de/resource/supplementary/12968_2011_2601_MOESM2_ESM.pdf/9582294)
Supplement: MOESM2 [file 9582294]

Patient (adult, non pregnant) with an indication for MR imaging procedure

No contraindications such as implantable devices, or metallic implants

Assess risk of renal impairment based on history

No history or risk factors for  
estimated GFR  $> 30\text{ml}/\text{min}/1.73\text{m}^2$

No laboratory testings  
required

Use GBCAs according to  
labeling

History or risk factors for  
estimated GFR  $< 30\text{ml}/\text{min}/1.73\text{m}^2$

Laboratory testings: GFR  $< 30\text{ml}/\text{min}/1.73\text{m}^2$   
→ Check Indication for CMR:  
alternative imaging  
techniques available?

MR imaging procedure is irreplaceable

Not on dialysis  
Discuss risks with patient  
good documentation  
Use low- risk GBCAs  
use lowest possible dosage,  
Close monitoring during and after  
imaging procedure

Dialysis- patient  
Discuss risks with patient, good  
documentation  
Use low- risk GBCAs  
Use lowest possible dosage  
Close monitoring during and after  
imaging procedure  
SCHEDULE FOR HEMODIALYSIS  
WITHIN 2h AFTER IMAGING  
PROCEDURE

Risk factors for chronic kidney disease: Diabetes, Hypertension, heart disease, smoking, obesity, high cholesterol, family history of kidney disease, age 65 or older, urinary tract infections/ obstructions, systemic infections or autoimmune diseases (Levey 2003)
